# Supplementary material for: TET2-mediated tumor cGAS triggers endothelial STING activation to regulate vasculature remodeling and anti-tumor immunity in liver cancer
Source: Springer Nature journal article supplement (doi:10.1038/s41467-023-43743-9), 2024-01-04
Supplement: MOESM1 [file 41467_2023_43743_MOESM1_ESM.pdf]

## Supplementary Information

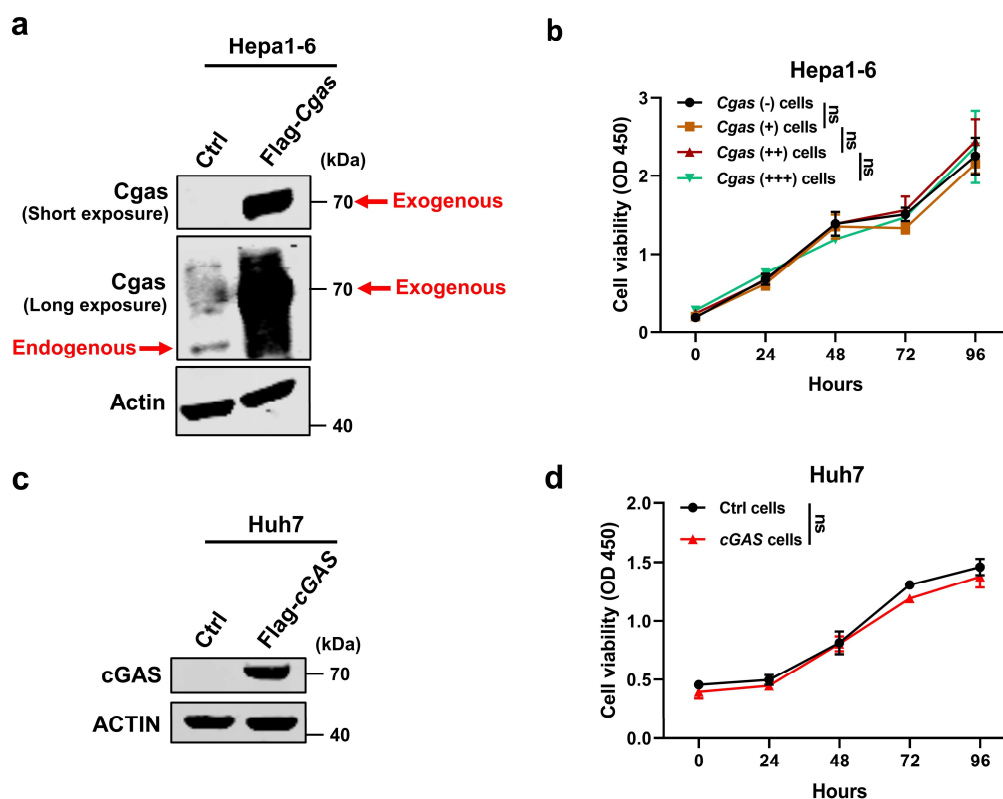

**Supplementary Fig. 1 cGAS overexpression does not alter liver cancer cell proliferation. a** Cgas protein level in Hepa1-6 cells with *Cgas* overexpression (Hepa1-6-*Cgas*) or the corresponding Ctrl cells (Hepa1-6-Ctrl). **b** Proliferation curves of Hepa1-6 cells with *Cgas* overexpression ( $n = 4$ ). **c** cGAS protein level in Huh7 cells with *cGAS* overexpression (Huh7-*cGAS*) or the corresponding Ctrl cells (Huh7-Ctrl). **d** Proliferation curves of Huh7-*cGAS* cells versus Ctrl cells ( $n = 4$ ). Representative of  $n = 3$  independent experiments (**a**, **c**).  $P$  values are calculated using two-way ANOVA (**b**, **d**). ns, not significant. Source data are provided as a Source Data file.

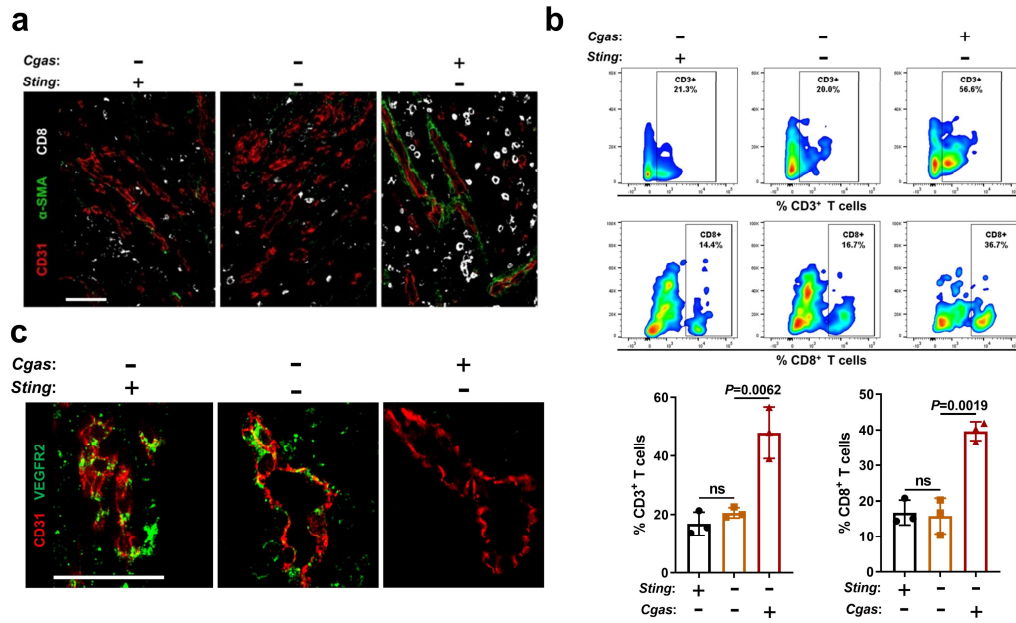

**Supplementary Fig. 2 Tumor cGAS regulates vascular normalization, maturation, and immune cell infiltration in an intrinsic STING-independent manner.** **a** Representative immunofluorescence images for pericyte ( $\alpha$ -SMA<sup>+</sup>) coverage of tumor vessels (CD31<sup>+</sup>) and CD8<sup>+</sup> T cells in indicated tumors. Scale bars, 100  $\mu$ m. **b** Flow cytometric analysis and frequency of CD3<sup>+</sup> T cells and CD8<sup>+</sup> T cells in indicated tumors ( $n = 3$ ). **c** Representative immunofluorescence images for VEGFR2<sup>+</sup> tumor vessels (CD31<sup>+</sup>) in indicated tumors. Scale bars, 50  $\mu$ m. Representative of  $n = 3$  independent experiments (**a**, **c**). *P* values are calculated using one-way ANOVA (**b**). ns, not significant. Source data are provided as a Source Data file.

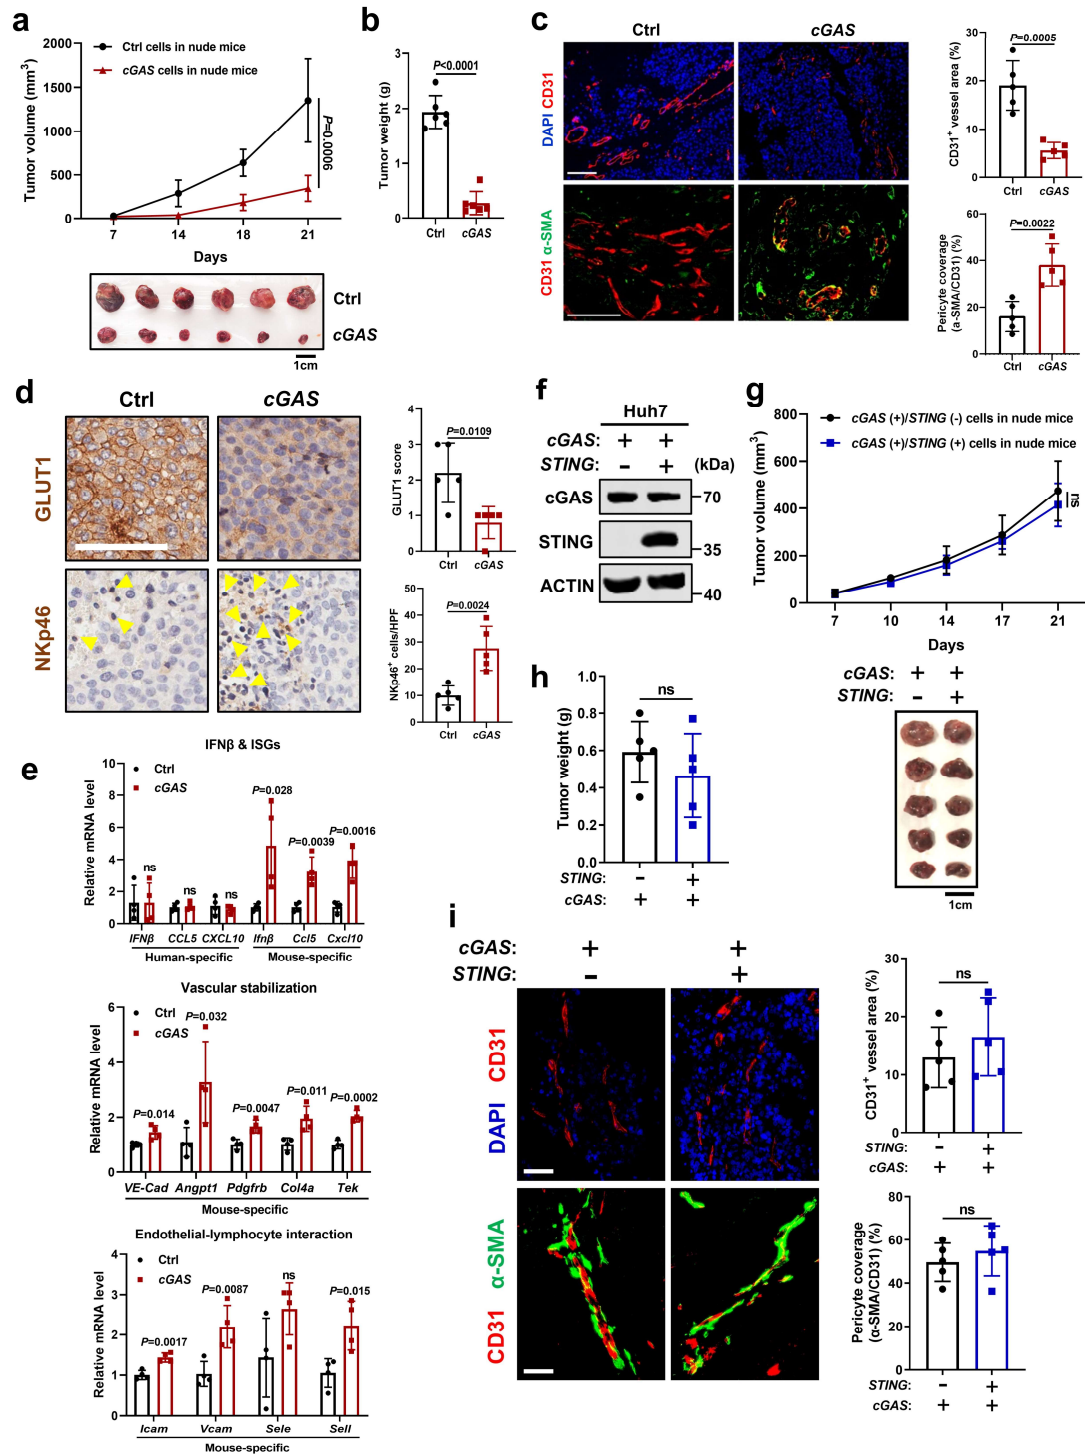

**Supplementary Fig. 3 Human liver cancer cGAS drives host STING activation, vascular normalization, and tumor repression.** **a, b** Tumor growth curves (**a**) and tumor burdens (**b**) in nude mice injected subcutaneously with Huh7-cGAS or Ctrl cells for 3 weeks ( $n = 6$  mice per group). **c** Representative immunofluorescence images and quantification for CD31<sup>+</sup> vessels density and pericyte ( $\alpha$ -SMA<sup>+</sup>) coverage of tumor vessels (CD31<sup>+</sup>) in Huh7-cGAS or Ctrl cells-derived tumors ( $n = 5$ ). Scale bars, 100  $\mu\text{m}$ . **d** Representative immunohistochemical images and quantification for GLUT1<sup>+</sup> hypoxic area and NK cells (NKp46<sup>+</sup>) in Huh7-cGAS or Ctrl cells-

derived tumors (n = 5). The yellow arrows represent NKp46<sup>+</sup> cells. Scale bars, 100  $\mu$ m. **e** mRNA levels of human-specific and mouse-specific genes related to IFN $\beta$  and ISGs, vascular stabilization, and endothelial-lymphocyte interaction in Huh7-*cGAS* or Ctrl cells-derived tumors (n = 4). **f** cGAS and STING protein levels in Huh7 cells with *cGAS* and *STING* overexpression. Representative of n = 3 independent experiments. **g, h** Tumor growth curves (**g**) and tumor burdens (**h**) in nude mice injected subcutaneously with Huh7-*cGAS* (+)/*STING* (+) or *cGAS* (+)/*STING* (-) cells for 3 weeks (n = 5 mice per group). **i** Representative immunofluorescence images and quantification for CD31<sup>+</sup> vessels density and pericyte ( $\alpha$ -SMA<sup>+</sup>) coverage of tumor vessels (CD31<sup>+</sup>) in Huh7-*cGAS* (+)/*STING* (+) or *cGAS* (+)/*STING* (-) cells-derived tumors (n = 5). Scale bars, 50  $\mu$ m. *P* values are calculated using two-way ANOVA (**a, g**) and two-tailed unpaired Student's *t* test (**b-e, h, i**). ns, not significant. Source data are provided as a Source Data file.



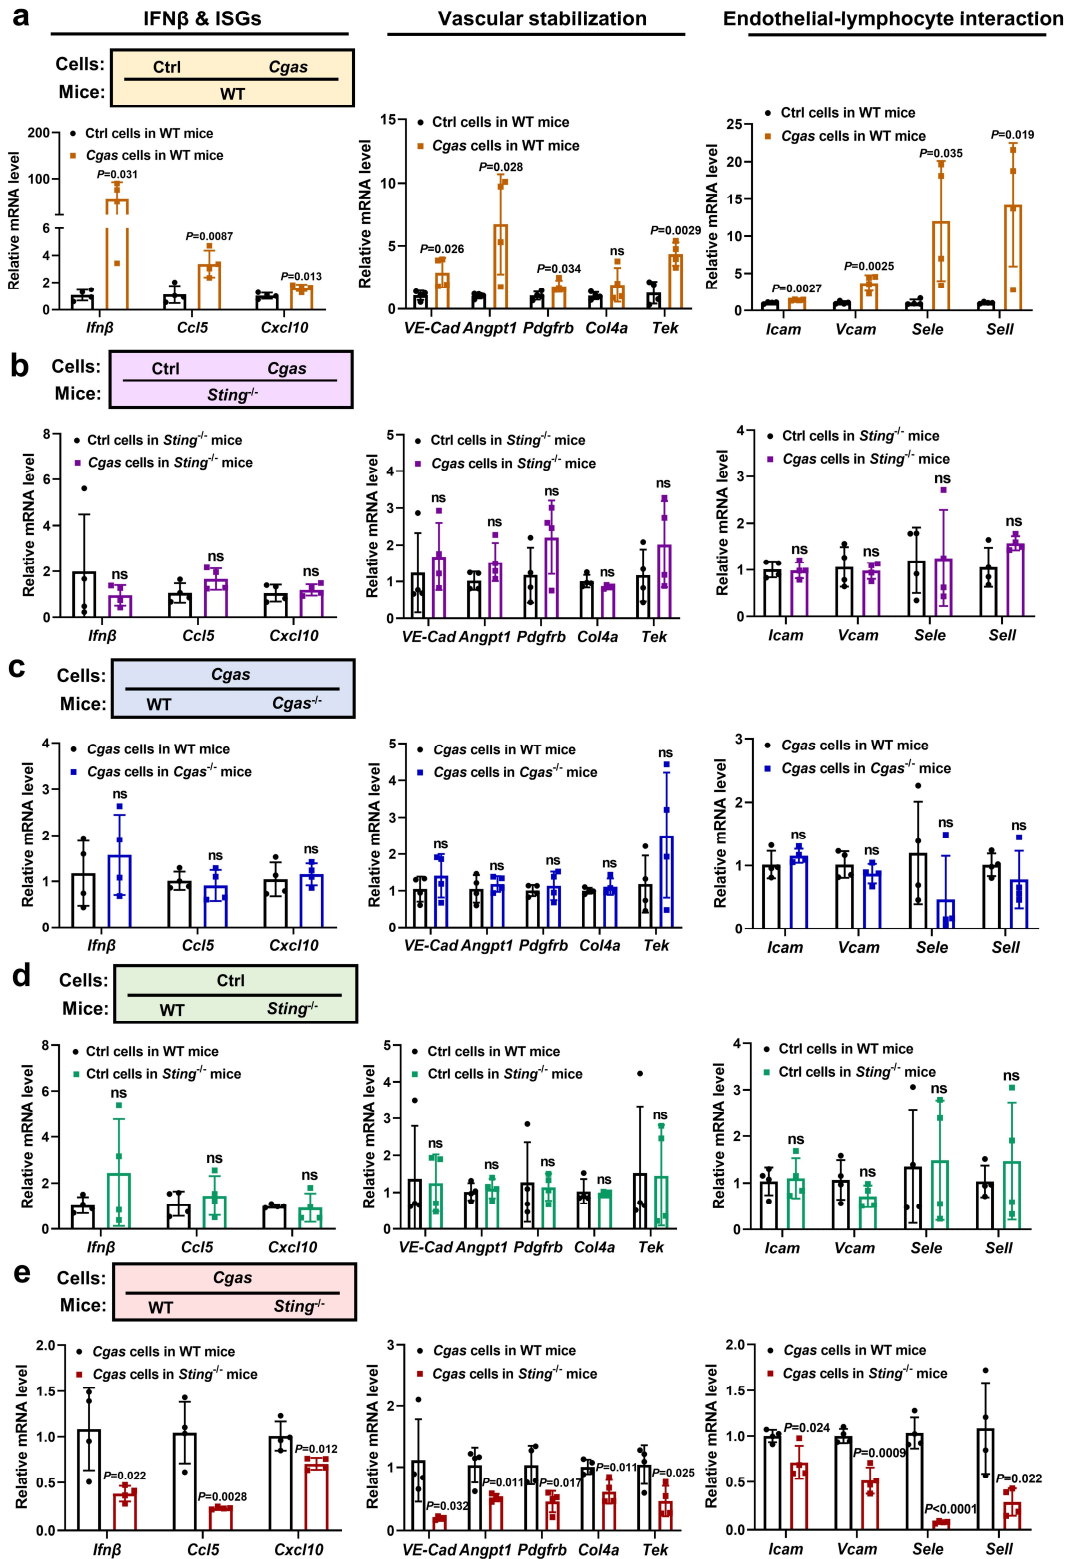

**Supplementary Fig. 4 Tumor cGAS and host STING mediates vascular normalizing genes expressions in an interdependence manner. a-e** mRNA levels of *Ifn $\beta$*  and ISGs, genes related to vascular stabilization, and endothelial-lymphocyte interaction in indicated tumors ( $n = 4$ ). *P* values are calculated using two-tailed unpaired Student's *t* test (**a-e**). ns, not significant. Source data are provided as a Source Data file.

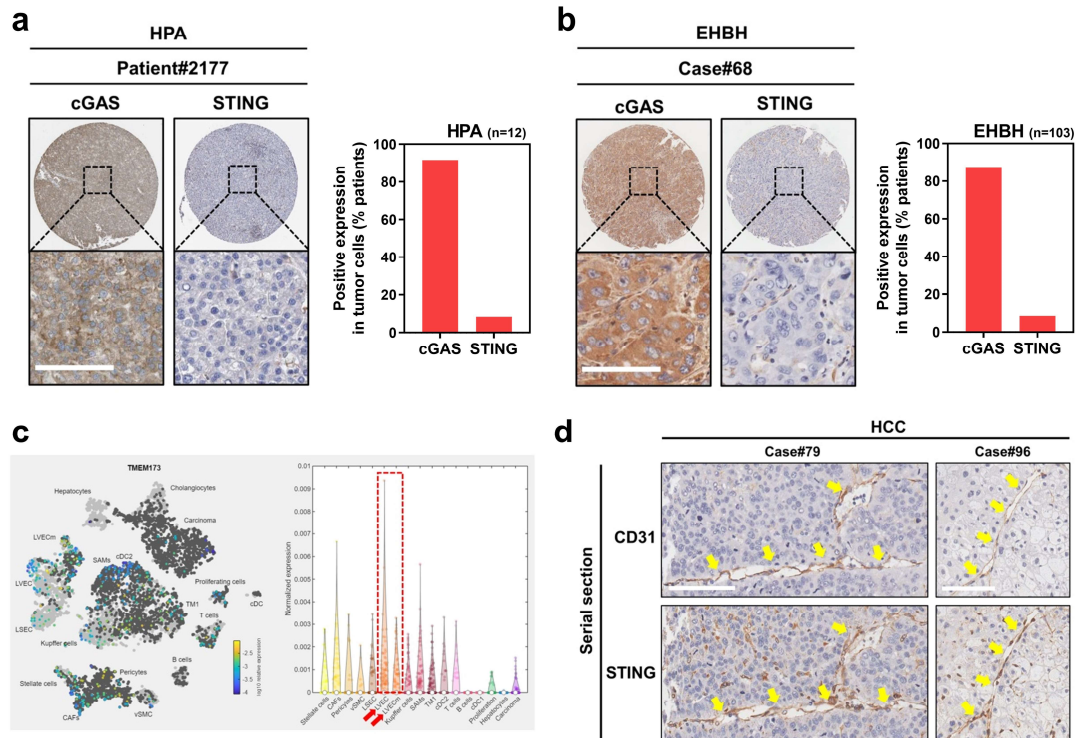

**Supplementary Fig. 5 Most liver cancer cells express cGAS, but hardly express STING, whereas endothelial cells show most distinct STING expression in tumor microenvironment.**

**a, b** Representative immunohistochemical images for cGAS and STING expressions in human liver cancer samples from HPA (**a**) and EHBH (**b**) and quantification for the proportion of patients with positive expression of cGAS or STING in liver cancer cells. Scale bars, 100  $\mu$ m. **c** TMEM173 (STING) mRNA expression in the single cell type clusters identified in malignant and adjacent non-malignant liver tissues from five patients (GEO: GSE146409). The cells formed 17 clusters including hepatocytes, endothelial cells (liver sinusoidal endothelial cells (LSEC), non-tumor liver vascular endothelial cells (LVEC), and tumor liver vascular endothelial cells (LVECM)), mesenchymal cells (stellate cells, cancer-associated fibroblasts (CAFs), pericytes, vascular smooth muscle cells (vSMC)), immune cells (Kupffer cells, scar-associated macrophages (SAMs), tissue monocytes 1 (TM1), cDC1, cDC2, T cells, and B cells), proliferating cells, and carcinoma cells. **d** Representative immunohistochemical images for CD31 and STING expressions in serial sections of HCC samples from the same patient from EHBH. The yellow arrows represent vessels. Scale bars, 100  $\mu$ m. Source data are provided as a Source Data file.

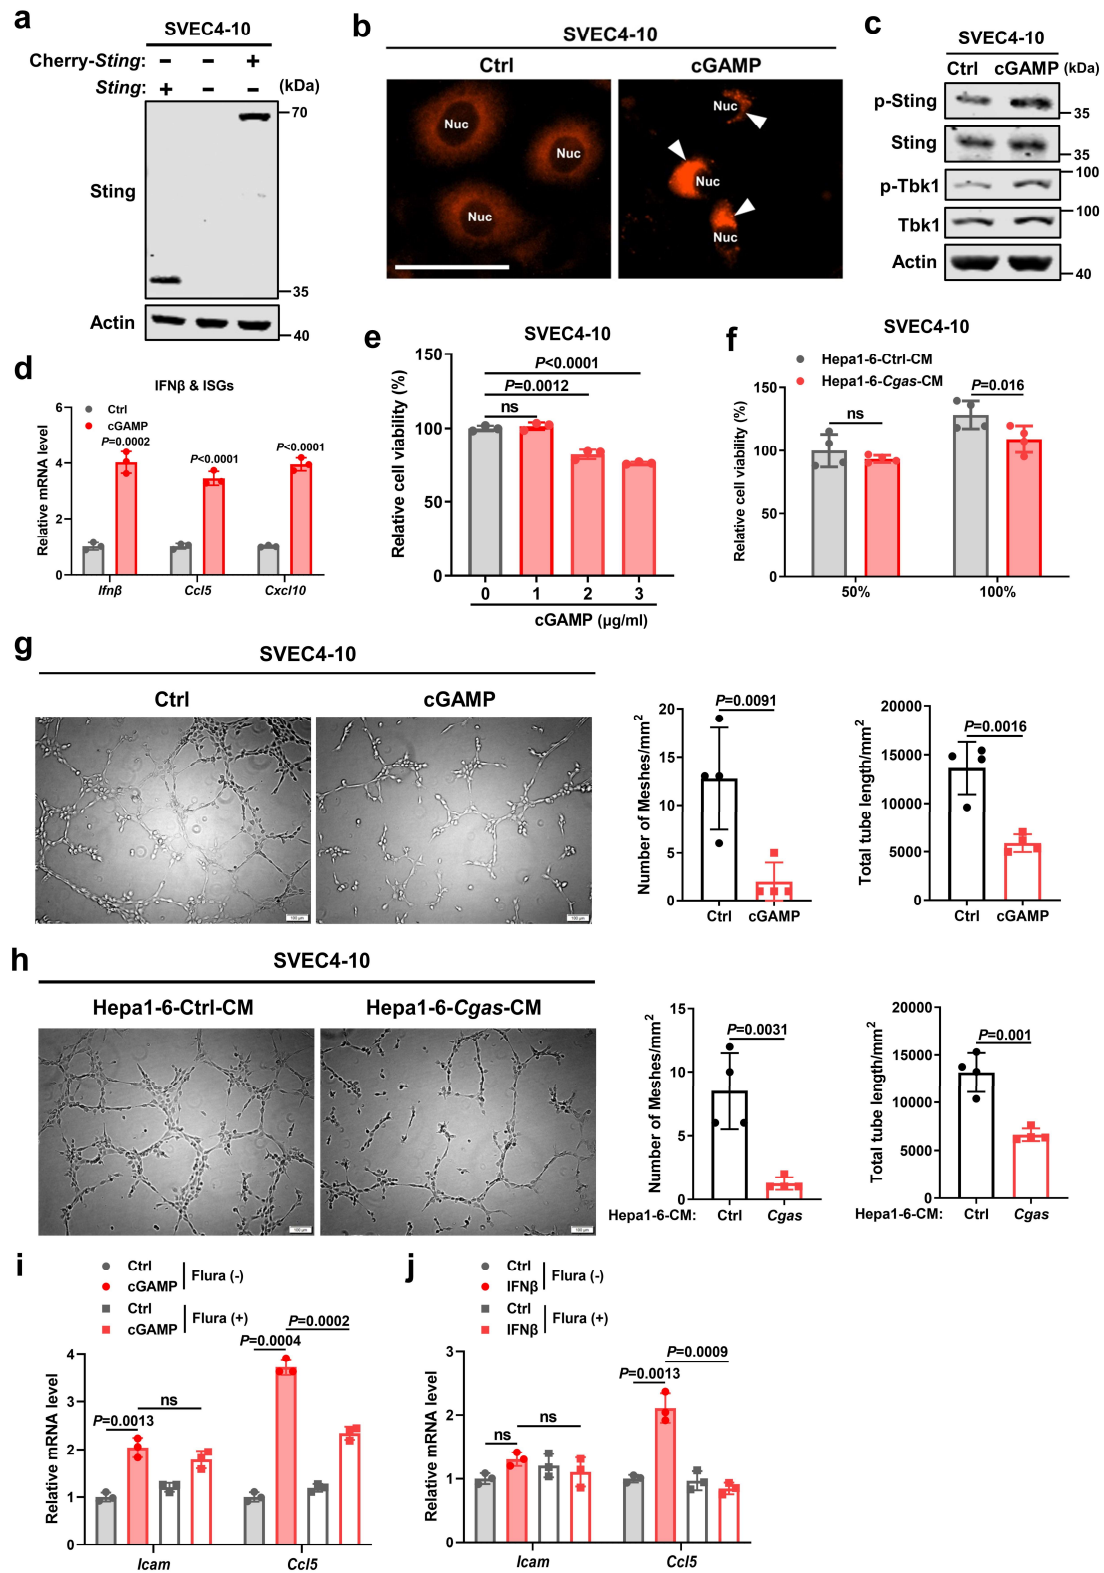

**Supplementary Fig. 6 Tumor cell cGAS produces cGAMP to suppress endothelial cell proliferation and angiogenesis.** **a** Sting protein levels in SVEC4-10 cells with *Sting*-Cherry overexpression following endogenous *Sting* knockout. **b** Representative immunofluorescence images for Sting aggregates in SVEC4-10 cells with *Sting*-Cherry overexpression after cGAMP treatment. The white arrows represent Sting aggregates in SVEC4-10 cells. Scale bars, 50  $\mu$ m. **c**

Protein levels of markers in the Sting pathway including total and p-Sting, total and p-Tbk1 in SVEC4-10 cells after cGAMP treatment. **d** mRNA levels of *Ifn $\beta$*  and ISGs in SVEC4-10 cells after cGAMP treatment (n = 3). **e, f** Relative cell viabilities of SVEC4-10 cells treated with Hepa1-6-*Cgas*/Ctrl cells-derived CM (**e**) or different concentrations of cGAMP (**f**) (n = 4). **g, h** Representative images and quantification from the Matrigel tube formation assay with SVEC4-10 cell pretreated with Hepa1-6-*Cgas*/Ctrl cells-derived CM (**g**) or cGAMP (**h**) (n = 4). **i** mRNA levels of *Icam* and *Ccl5* in SVEC4-10 cells after cGAMP treatment following Flura pretreatment (n = 3). **j** mRNA levels of *Icam* and *Ccl5* in SVEC4-10 cells after IFN $\beta$  treatment following Flura pretreatment (n = 3). Representative of n = 3 independent experiments (**a-c**). *P* values are calculated using two-tailed unpaired Student's *t* test (**d, f-h**) and one-way ANOVA (**e, i**). ns, not significant. Source data are provided as a Source Data file.

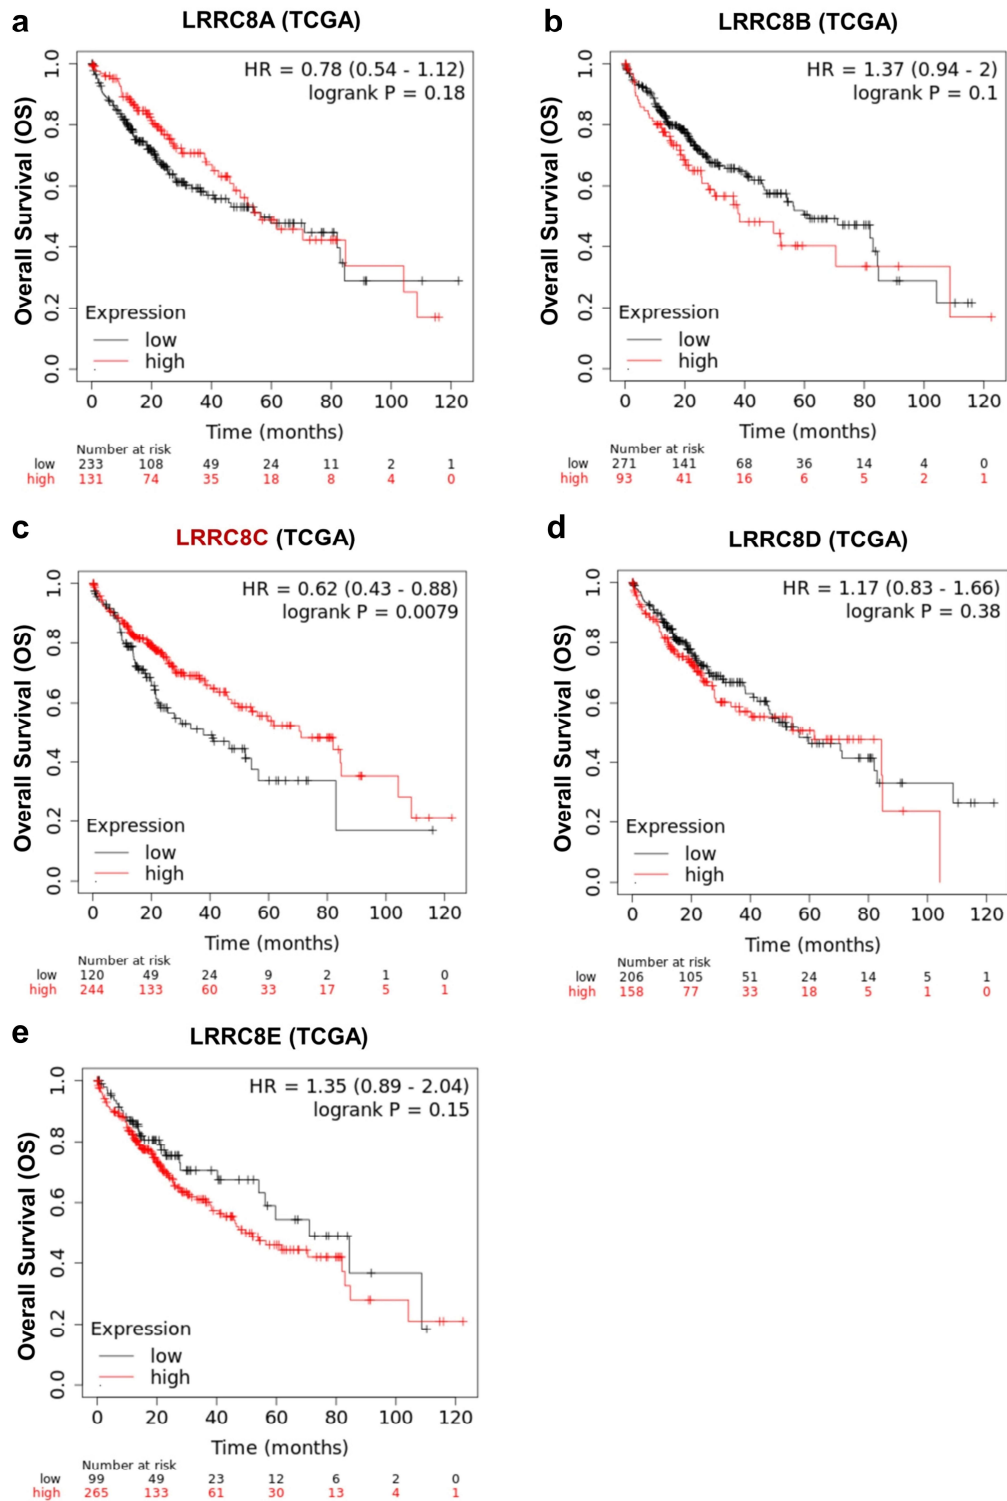

**Supplementary Fig. 7 High LRRC8C expression is correlated with better clinical outcomes in liver cancer. a-e** Kaplan-Meier analysis of overall survival (OS) in HCC patients according to LRRC8A-E expression from TCGA dataset (n = 364).

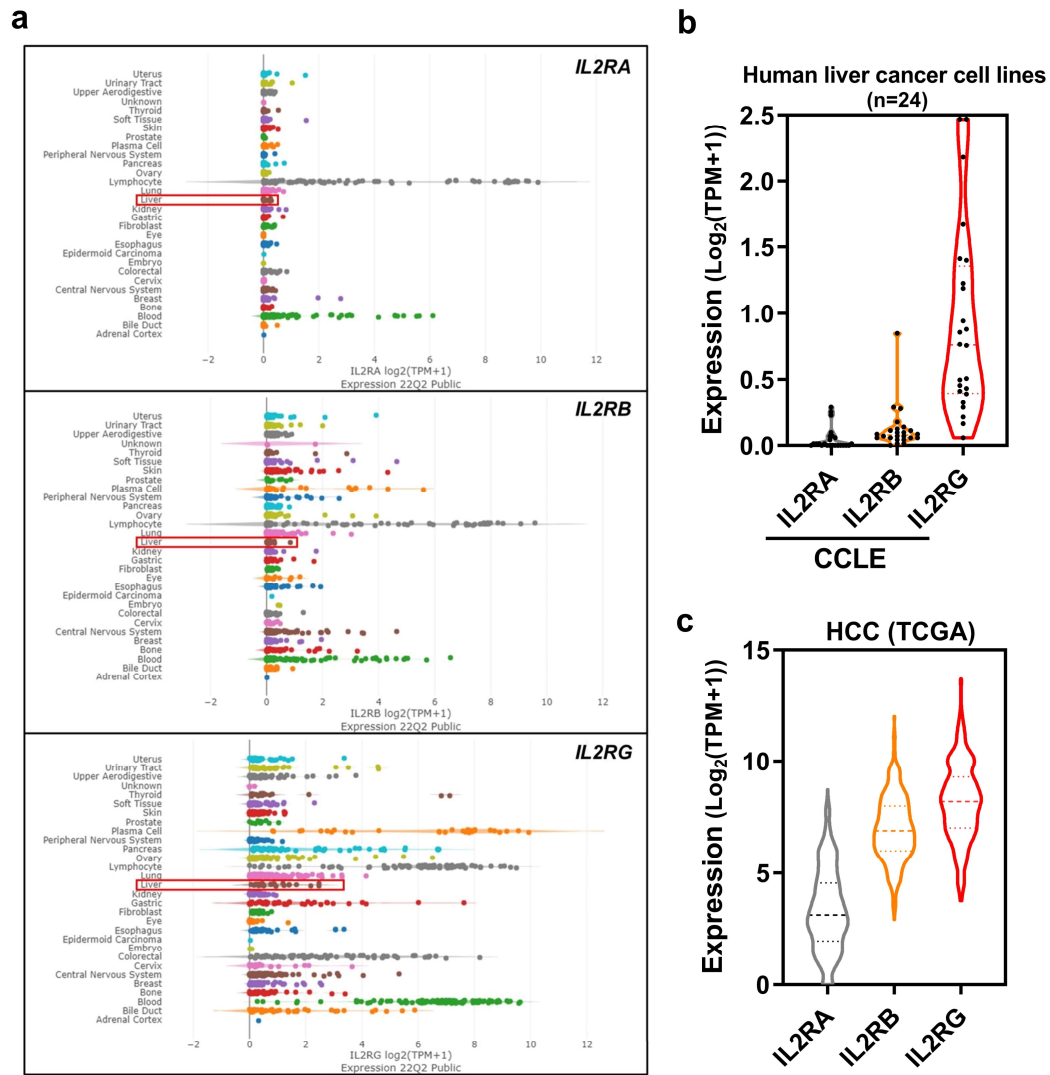

**Supplementary Fig. 8 IL2R is also expressed in liver cancer cells.** **a** *IL2RA*, *IL2RB*, and *IL2RG* expressions in cancer cell lines from diverse tissue lineages from CCLE dataset. **b** *IL2RA*, *IL2RB*, and *IL2RG* expressions in liver cancer cell lines from CCLE dataset (n = 24). **c** *IL2RA*, *IL2RB*, and *IL2RG* expressions in HCC from TCGA dataset (n = 371). Source data are provided as a Source Data file.

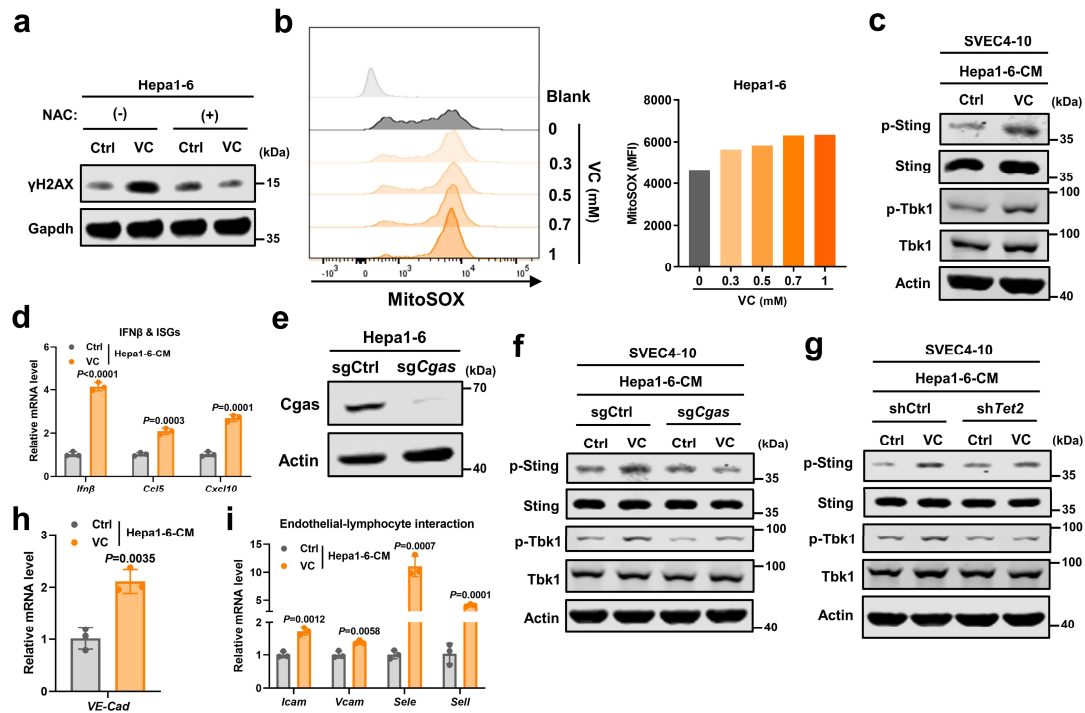

**Supplementary Fig. 9 VC-induced TET2 and dsDNA leakage activate tumor cGAS-cGAMP-endothelial STING pathway.** **a**  $\gamma$ H2AX protein level in Hepa1-6 cells after VC treatment following NAC pretreatment. **b** Flow cytometric analysis and MFI of MitoSOX in Hepa1-6 cells after VC treatment. **c** Protein levels of markers in the Sting pathway including total and p-Sting, total and p-Tbk1 in SVEC4-10 cells after exposure to CM from VC-treated Hepa1-6 cells. **d** mRNA levels of *Ifn $\beta$*  and ISGs in SVEC4-10 cells after exposure to CM from VC-treated Hepa1-6 cells ( $n = 3$ ). **e** Cgas protein level in Hepa1-6 cells with *Cgas* knocked out by sgRNA (sgCgas) or Ctrl cells (sgCtrl). **f** Protein levels of markers in the Sting pathway including total and p-Sting, total and p-Tbk1 in SVEC4-10 cells after exposure to CM from VC-treated Hepa1-6 sgCgas cells or sgCtrl cells. **g** Protein levels of markers in the Sting pathway including total and p-Sting, total and p-Tbk1 in SVEC4-10 cells after exposure to CM from VC-treated Hepa1-6 shTet2 cells or shCtrl cells. **h** VE-Cad mRNA level in SVEC4-10 cells after exposure to CM from VC-treated Hepa1-6 cells ( $n = 3$ ). **i** mRNA levels of endothelial-lymphocyte interaction-associated genes in SVEC4-10 cells after exposure to CM from VC-treated Hepa1-6 cells ( $n = 3$ ). Representative of  $n = 3$  independent experiments (**a**, **c**, **e-g**) and one independent experiment (**b**).  $P$  values are calculated using two-tailed unpaired Student's  $t$  test (**d**, **h**, **i**). Source data are provided as a Source Data file.



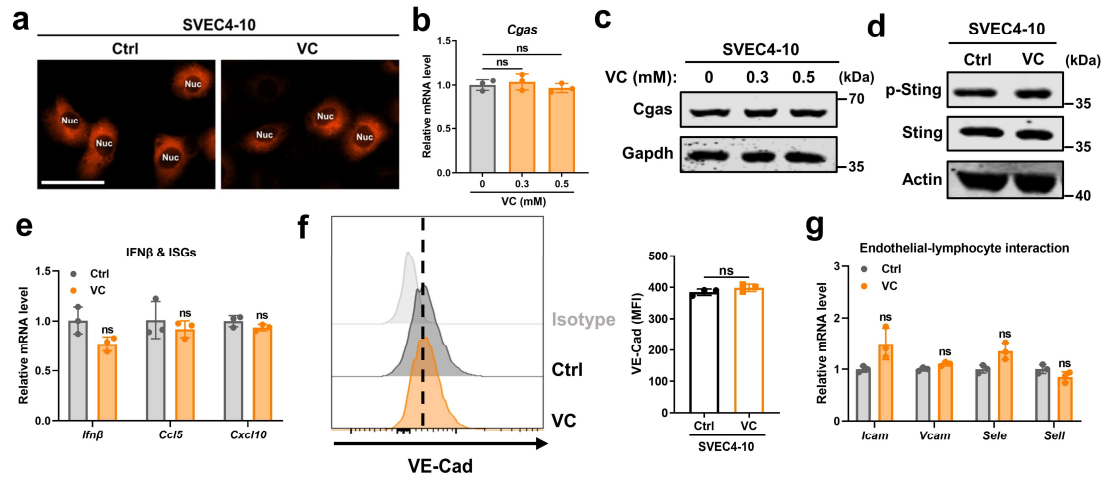

**Supplementary Fig. 10 Direct VC stimulation fails to activate endothelial STING pathway.** **a** Representative immunofluorescence images for Sting aggregates in SVEC4-10 cells with *Sting*-Cherry overexpression after VC treatment. Scale bars, 50  $\mu$ m. **b** *Cgas* mRNA level in SVEC4-10 cells after VC treatment (n = 3). **c** *Cgas* protein level in SVEC4-10 cells after VC treatment. **d** Protein levels of markers in the Sting pathway including total and p-Sting in SVEC4-10 cells after VC treatment. **e** mRNA levels of Ifn $\beta$  and ISGs in SVEC4-10 cells after VC treatment (n = 3). **f** Flow cytometric analysis and MFI of surface VE-Cad in SVEC4-10 cells after VC treatment (n = 3). **g** mRNA levels of endothelial-lymphocyte interaction-associated genes in SVEC4-10 cells after VC treatment (n = 3). Representative of n = 3 independent experiments (**a**, **c**, **d**). *P* values are calculated using one-way ANOVA (**b**) and two-tailed unpaired Student's *t* test (**e-g**). ns, not significant. Source data are provided as a Source Data file.



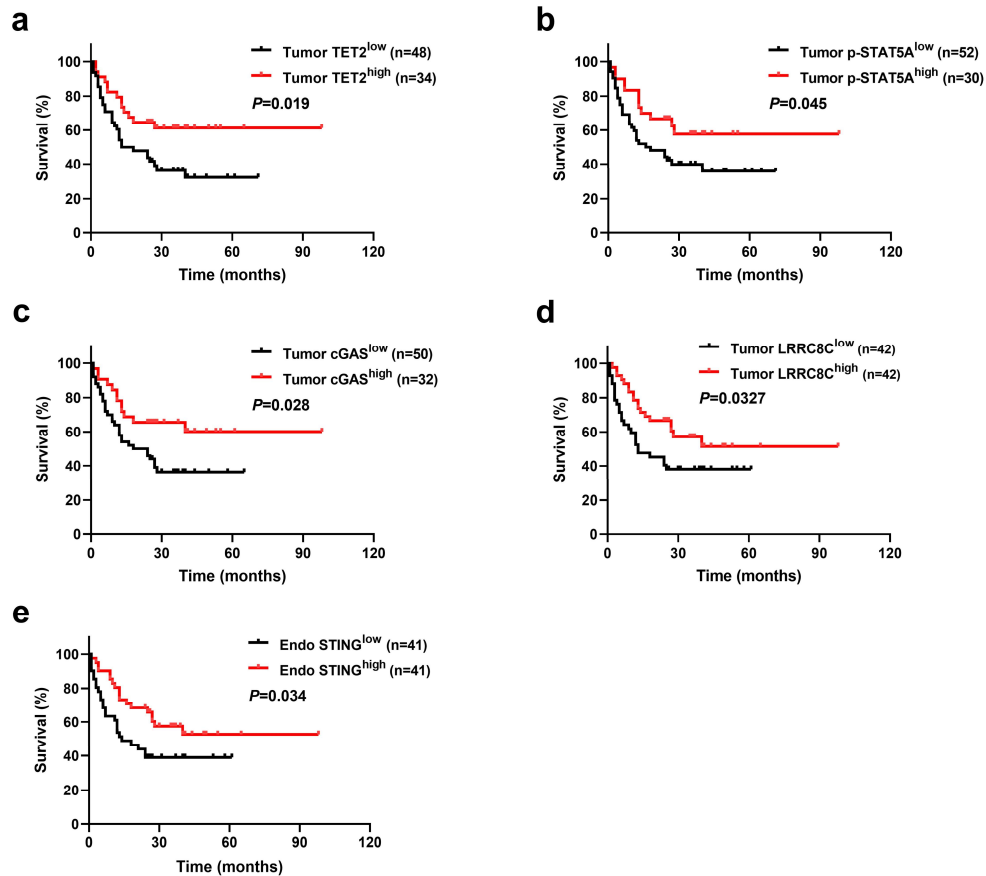

**Supplementary Fig. 11 Tumor TET2/p-STAT5A/cGAS/LRRC8C/endothelial STING expressions predict better prognosis in human liver cancer.** **a-d** Kaplan-Meier analysis of disease-free survival (DFS) in HCC patients according to tumor TET2 (**a**), p-STAT5A (**b**), cGAS (**c**), or LRRC8C (**d**) expressions (n = 82). **e** Kaplan-Meier analysis of disease-free survival (DFS) in HCC patients according to endothelial STING expression (n = 82). Source data are provided as a Source Data file.

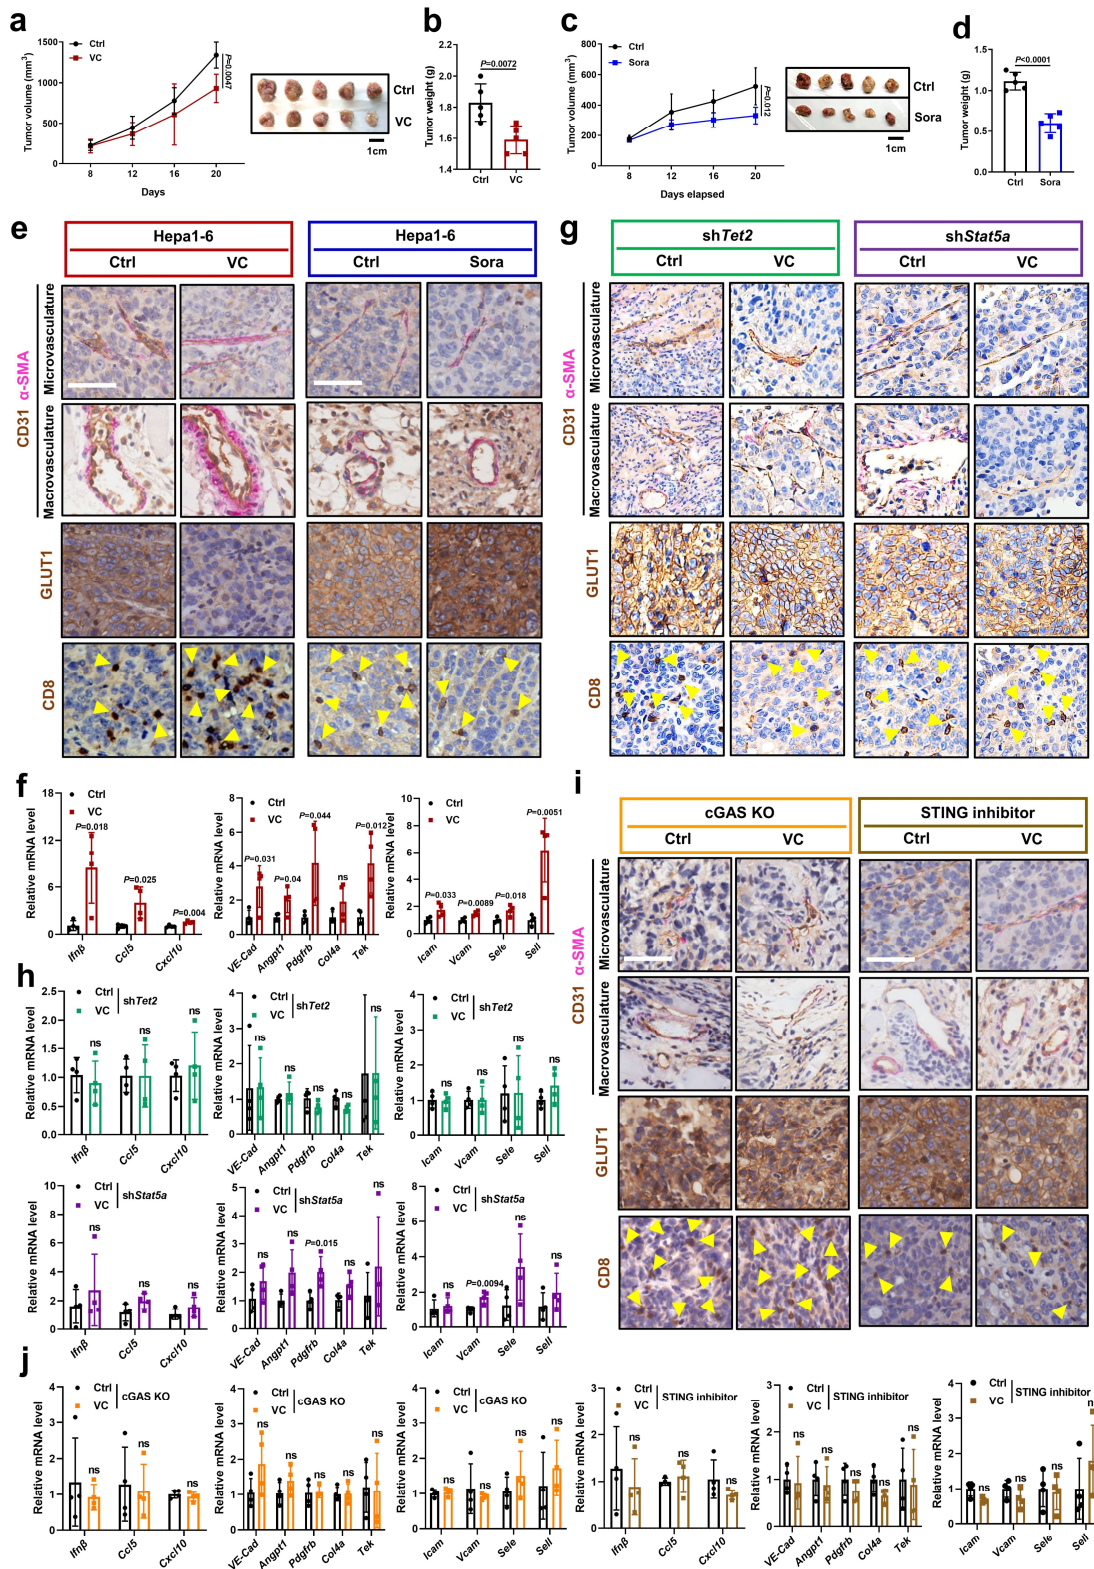

**Supplementary Fig. 12 Tumor TET2-STAT5A-cGAS-host STING axis mediates VC-induced vascular normalization.** **a, b** Tumor growth curves (**a**) and tumor burdens (**b**) in C57BL/6 mice injected subcutaneously with Hepa1-6 cells with VC treatment (n = 5 mice per group). **c, d** Tumor growth curves (**c**) and tumor burdens (**d**) in C57BL/6 mice injected subcutaneously with Hepa1-6 cells with Sora treatment (n = 5 mice per group). **e** Representative immunohistochemical images

for CD31<sup>+</sup> vessels density, pericyte ( $\alpha$ -SMA<sup>+</sup>) coverage of vessels (CD31<sup>+</sup>), GLUT1<sup>+</sup> hypoxic area, and CD8<sup>+</sup> T cells in VC-treated or Sora-treated tumors (n = 5). The yellow arrows represent CD8<sup>+</sup> T cells. Scale bars, 100  $\mu$ m. **f** mRNA levels of *Ifn $\beta$*  and ISGs, genes related to vascular stabilization, and endothelial-lymphocyte interaction in VC-treated tumors (n = 4). **g** Representative immunohistochemical images for CD31<sup>+</sup> vessels density, pericyte ( $\alpha$ -SMA<sup>+</sup>) coverage of vessels (CD31<sup>+</sup>), GLUT1<sup>+</sup> hypoxic area, and CD8<sup>+</sup> T cells in VC-treated sh*Tet2* tumors or VC-treated sh*Stat5a* tumors (n = 5). The yellow arrows represent CD8<sup>+</sup> T cells. Scale bars, 100  $\mu$ m. **h** mRNA levels of *Ifn $\beta$*  and ISGs, genes related to vascular stabilization, and endothelial-lymphocyte interaction in VC-treated sh*Tet2* tumors or VC-treated sh*Stat5a* tumors (n = 4). **i** Representative immunohistochemical images for CD31<sup>+</sup> vessels density, pericyte ( $\alpha$ -SMA<sup>+</sup>) coverage of vessels (CD31<sup>+</sup>), GLUT1<sup>+</sup> hypoxic area, and CD8<sup>+</sup> T cells in cGAS KO tumors or STING inhibitor-treated tumors after VC treatment (n = 5). The yellow arrows represent CD8<sup>+</sup> T cells. Scale bars, 100  $\mu$ m. **j** mRNA levels of *Ifn $\beta$*  and ISGs, genes related to vascular stabilization, and endothelial-lymphocyte interaction in cGAS KO tumors or STING inhibitor-treated tumors after VC treatment (n = 4). Data are shown as mean  $\pm$  SD. *P* values are calculated using two-way ANOVA (**a**, **c**) and two-tailed unpaired Student's *t* test (**b**, **d**, **f**, **h**, **j**). ns, not significant. Source data are provided as a Source Data file.

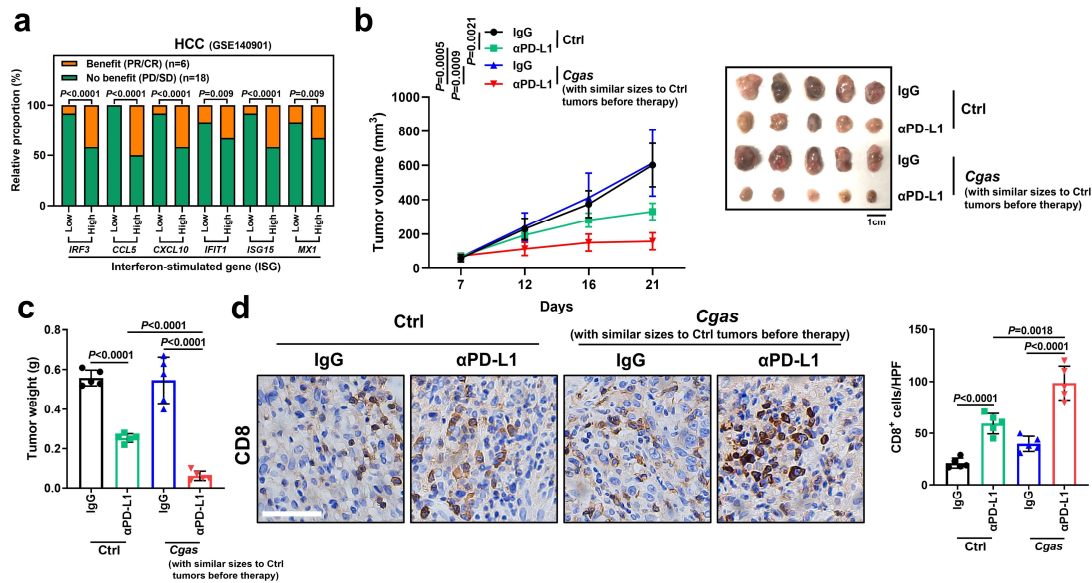

**Supplementary Fig. 13 Tumor cGAS potentiates anti-PD-L1 therapy efficacy in liver cancer.**

**a** Correlation analysis of IFN-stimulated gene (ISG) expression and responses of patients with HCC to anti-PD-1/anti-PD-L1 treatment (n = 24) (GEO: GSE140901). The low and high expression groups were divided relative to the median expression values. PR, partial response; CR, complete response; PD, progressive disease; SD, stable disease. **b, c** Tumor growth curves (**b**) and tumor burdens (**c**) of C57BL/6 mice injected subcutaneously with Ctrl cells and *Cgas* cells (numbers of *Cgas* cells were adjusted to develop similar tumor sizes to Ctrl tumors before therapy) with treatment of αPD-L1 or IgG control (n = 5 mice per group). **d** Representative immunohistochemical images and quantification for CD8<sup>+</sup> T cells in indicated tumors (n = 5). *P* values are calculated using Chi-square test (**a**), two-way ANOVA (**b**), and one-way ANOVA (**c, d**). Source data are provided as a Source Data file.

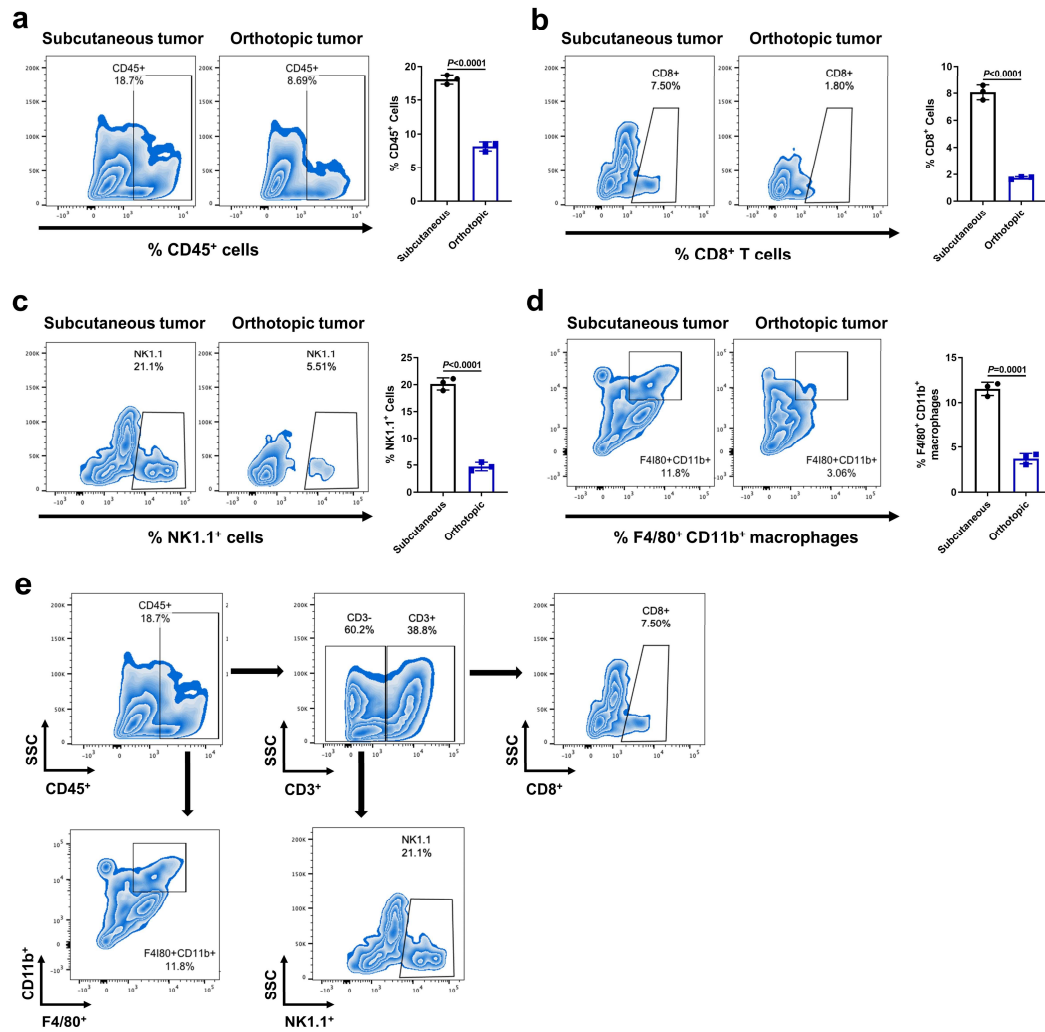

**Supplementary Fig. 14 The differences in immune cell infiltration between subcutaneous and orthotopic liver cancer models.** **a-d** Flow cytometric analysis and frequency of CD45<sup>+</sup> cells (**a**), CD8<sup>+</sup> T cells (**b**), NK1.1<sup>+</sup> cells (**c**), and F4/80<sup>+</sup>CD11b<sup>+</sup> macrophages (**d**) in subcutaneous tumors versus orthotopic tumors derived from Hepa1-6 cells (n = 3). **e** Flow cytometric gating strategies for indicated cells (Supplementary Fig. 14a, b, Supplementary Fig. 15f). *P* values are calculated using two-tailed unpaired Student's *t* test (**a-d**). Source data are provided as a Source Data file.



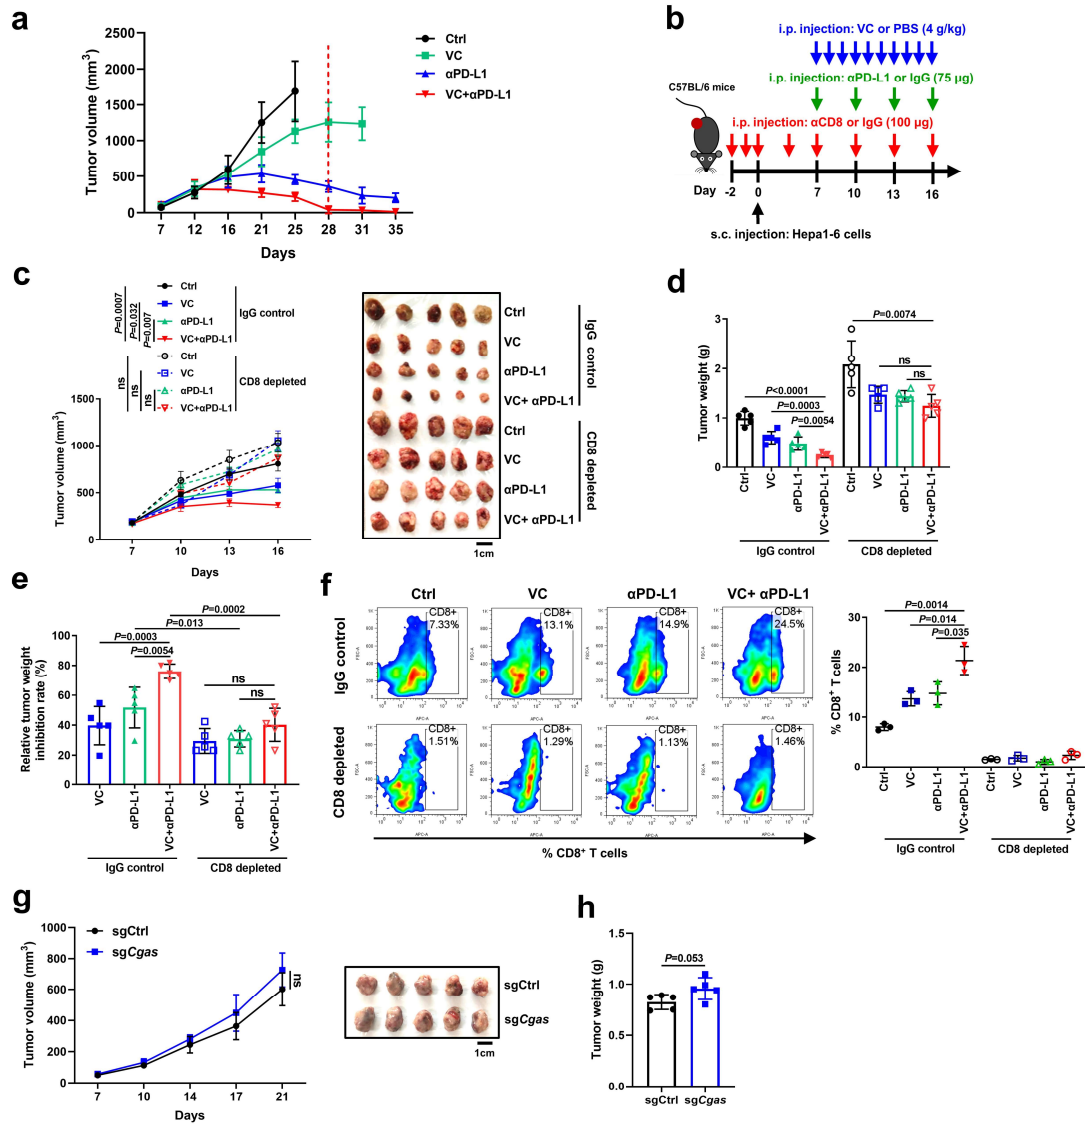

**Supplementary Fig. 15 The combinational efficiency of VC and anti-PD-L1 therapy depending on CD8<sup>+</sup> T cell-induced anti-tumor immune response.** **a** Tumor growth curves of C57BL/6 mice injected subcutaneously with Hepa1-6 cells with treatment of  $\alpha$ PD-L1 and VC either alone or in combination (n = 5 mice per group). **b-d** Scheme representing the experimental procedure (**b**), tumor growth curves (**c**), and tumor burdens (**d**) of C57BL/6 mice injected subcutaneously with Hepa1-6 cells with treatment of  $\alpha$ PD-L1 and VC either alone or in combination after CD8 depletion (n = 5 mice per group). **e** Relative tumor weight inhibition rates in tumors with treatment of  $\alpha$ PD-L1 and VC either alone or in combination after CD8 depletion (n = 5). **f** Flow cytometric analysis and frequency of CD8<sup>+</sup> T cells in tumors with treatment of  $\alpha$ PD-L1 and VC either alone or in combination after CD8 depletion (n = 3). **g, h** Tumor growth curves (**g**) and tumor burdens (**h**) in C57BL/6 mice injected subcutaneously with Hepa1-6-sgCgas or sgCtrl cells for 3 weeks (n = 5 mice per group). P values are calculated using two-way ANOVA (**a, c, g**), one-way ANOVA (**d-f**), and two-tailed unpaired Student's *t* test (**h**). ns, not significant. Source data are provided as a Source Data file.

**Supplementary Table 1. Primers used for qRT-PCR analysis.**

| <b>Target</b>                           | <b>Forward primer</b>    | <b>Reverse primer</b>   |
|-----------------------------------------|--------------------------|-------------------------|
| <i>IFN<math>\beta</math></i> (human)    | ATGACCAACAAGTGTCTCCTCC   | GGAATCCAAGCAAGTTGTAGCTC |
| <i>CCL5</i> (human)                     | CCAGCAGTCGTCCTTTGTCAC    | CTCTGGGTTGGCACACACTT    |
| <i>CXCL10</i> (human)                   | GTGGCATTCAAGGAGTACCTC    | TGATGGCCTTCGATTCTGGATT  |
| <i>Ifn<math>\beta</math></i> (mouse)    | CAGCTCCAAGAAAGGACGAAC    | GGCAGTGTAACCTCTTCTGCAT  |
| <i>Ccl5</i> (mouse)                     | GCTGCTTTGCCTACCTCTCC     | TCGAGTGACAAACACGACTGC   |
| <i>Cxcl10</i> (mouse)                   | CCAAGTGCTGCCGTCATTTTC    | GGCTCGCAGGGATGATTTCAA   |
| <i>VE-Cad</i> (mouse)                   | CACTGCTTTGGGAGCCTTC      | GGGGCAGCGATTTCATTTTTCT  |
| <i>Angpt1</i> (mouse)                   | CACATAGGGTGCAGCAACCA     | CGTCGTGTTCTGGAAGAATGA   |
| <i>Pdgfrb</i> (mouse)                   | TTCCAGGAGTGATACCAGCTT    | AGGGGGCGTGATGACTAGG     |
| <i>Col4a</i> (mouse)                    | CTGGCACAAAAGGGACGAG      | ACGTGGCCGAGAATTTCCACC   |
| <i>Tek</i> (mouse)                      | GAGTCAGCTTGCTCCTTTATGG   | AGACACAAGAGGTAGGGAATTGA |
| <i>Icam</i> (mouse)                     | GTGATGCTCAGGTATCCATCCA   | CACAGTTCTCAAAGCACAGCG   |
| <i>Vcam</i> (mouse)                     | AGTTGGGGATTTCGGTTGTTCT   | CCCCTCATTCTTACCACCC     |
| <i>Sele</i> (mouse)                     | ATGCCTCGCGCTTTCTCTC      | GTAGTCCCGCTGACAGTATGC   |
| <i>Sell</i> (mouse)                     | TACATTGCCCAAAAGCCCTTAT   | CATCGTTCCATTTCCAGAGTC   |
| <i>Cgas</i> (mouse)                     | GAGGCGCGGAAAGTCGTAA      | TTGTCCGGTTCCTTCCTGGA    |
| <i>Tet1</i> (mouse)                     | ACACAGTGGTGCTAATGCAG     | AGCATGAACGGGAGAATCGG    |
| <i>Tet2</i> (mouse)                     | AGAGAAGACAATCGAGAAGTCGG  | CCTTCCGTACTCCCAAACATCAT |
| <i>Tet3</i> (mouse)                     | TGCGATTGTGTGCGAACAAATAGT | TCCATACCGATCCTCCATGAG   |
| <i>Stat1</i> (mouse)                    | TCACAGTGGTTCGAGCTTCAG    | GCAAACGAGACATCATAGGCA   |
| <i>Stat5a</i> (mouse)                   | CGCCAGATGCAAGTGTTGTAT    | TCCTGGGGATTATCCAAGTCAAT |
| <i><math>\beta</math>-Actin</i> (mouse) | GGCTGTATTCCCCTCCATCG     | CCAGTTGGTAACAATGCCATGT  |
| <i>Cgas</i> promoter (mouse)-ChIP       | GCAAAATGAGTTCCGCCAAG     | TTGGCTGCTGAGATTCCGTA    |
